# Supplementary material
Source: PubMed Central journal article supplement (PMC555730)

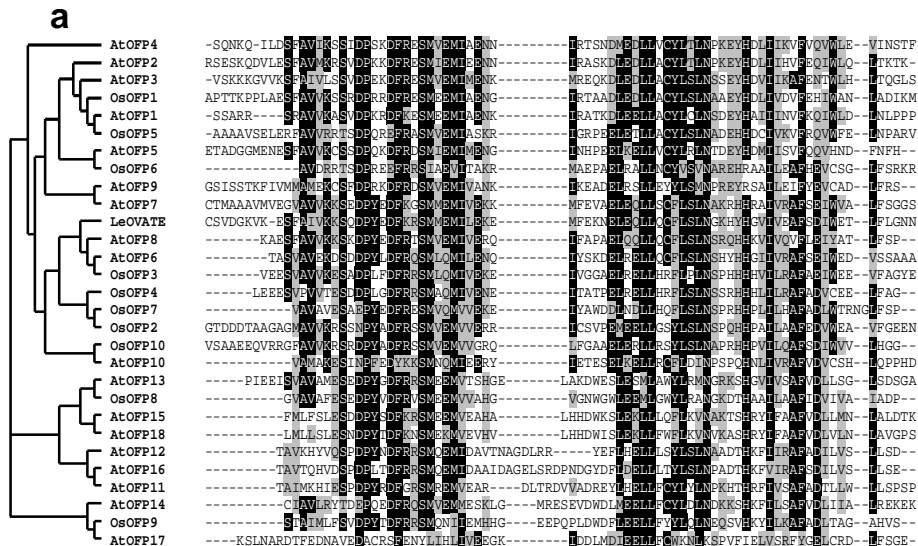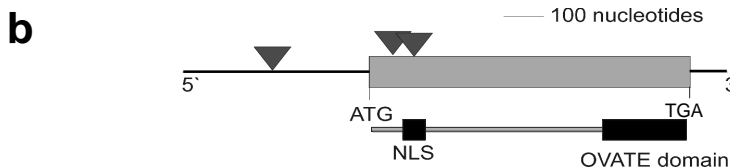

Supplement: pnas_102_13_4908__1.pdf [file pnas_102_13_4908__1.pdf]

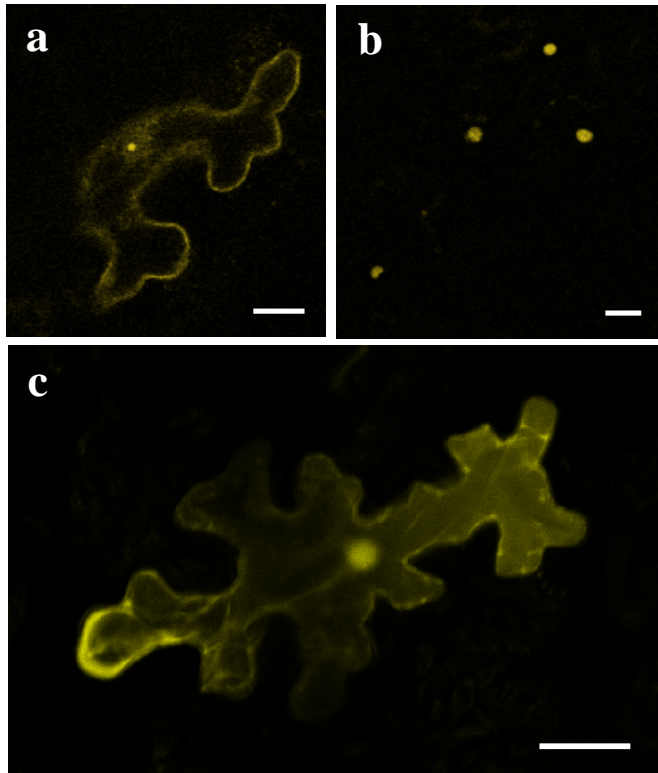

Supplement: pnas_102_13_4908__2.pdf [file pnas_102_13_4908__2.pdf]

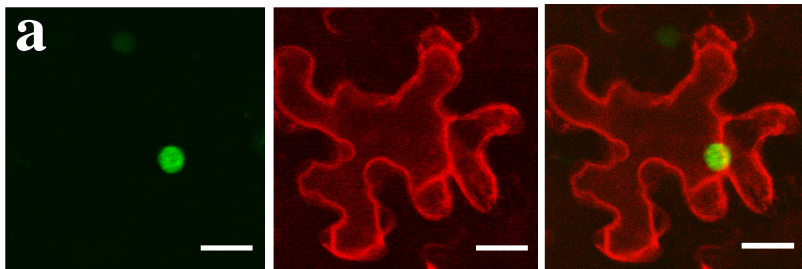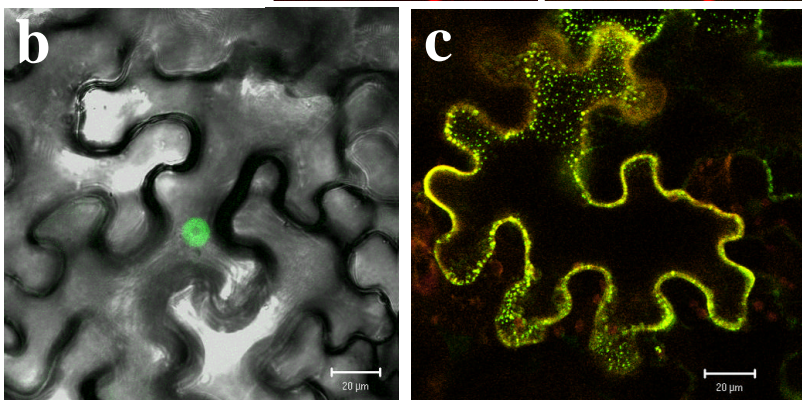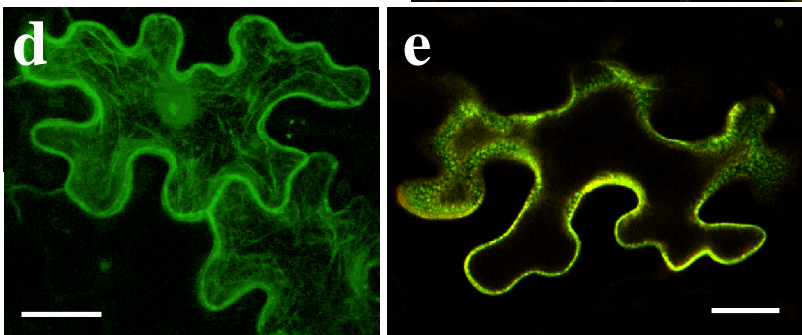

Supplement: pnas_102_13_4908__3.pdf [file pnas_102_13_4908__3.pdf]
